# Supplementary material for: A new kind of thermocouple made of p-type and n-type semi-conductive oxides with giant thermoelectric voltage for high temperature sensing
Source: Royal Society of Chemistry journal article supplement (doi:10.1039/c8tc00171e), 2018-01-01
Supplement: c8tc00171e1.pdf [file c8tc00171e1.pdf]

Electronic Supplementary Material (ESI) for Journal of Materials Chemistry C.  
This journal is © The Royal Society of Chemistry 2018

## Electronic Supplementary Information

### A New Kind of Thermocouple Made of *p*-Type and *n*-Type Semi-Conductive

### Oxides with Giant Thermoelectric Voltage for High Temperature Sensing

Dan Liu,<sup>ab</sup> Peng Shi,<sup>\*ab</sup> Wei Ren,<sup>\*ab</sup> Yantao Liu,<sup>ab</sup> Gang Niu,<sup>ab</sup> Ming Liu,<sup>ab</sup> Nan Zhang,<sup>ab</sup> Bian Tian,<sup>bc</sup> Weixuan Jing,<sup>bc</sup> Zhuangde Jiang,<sup>\*bc</sup> and Zuo-Guang Ye,<sup>abd</sup>

<sup>a</sup> *Electronic Materials Research Laboratory, Key Laboratory of the Ministry of Education & International Center for Dielectric Research, Xi'an Jiaotong University, Xi'an 710049, China.*

<sup>b</sup> *International Joint Laboratory for Micro/Nano Manufacturing and Measurement Technologies, Xi'an Jiaotong University, Xi'an 710049, China.*

<sup>c</sup> *International Joint Laboratory for Micro/Nano Manufacturing and Measurement Technologies, Xi'an Jiaotong University, Xi'an 710049, Shaanxi, China.*

<sup>d</sup> *Department of Chemistry and 4D LABS, Simon Fraser University, 8888 University Drive Burnaby, British Columbia, V5A 1S6, Canada.*

*\*Corresponding Author: spxjy@mail.xjtu.edu.cn; (P. Shi); E-mail: wren@mail.xjtu.edu.cn; (W. Ren);*

*zdjiang@mail.xjtu.edu.cn;*

*(Z-D.*

*Jiang)*

The schematic diagram of screen-printing thermocouple is shown in Fig. S1. Firstly, the powder of material *A* synthesized by sol-gel method is put into a beaker. Then, the binder is added in the breaker under stirring to form the screen-printing paste. After that, the prepared paste is loaded on the top of the screen with a *L*-form pattern. Through the movement of wiper, one electrode composed of material *A* is screen-printed on the surface of  $\text{Al}_2\text{O}_3$  substrate and then heated on the heating stage at  $110\text{ }^\circ\text{C}$  for 10 minutes. Secondly, another electrode of thermocouple is fabricated by the same steps with the powder of material *B*. Finally, the copper wires are attached onto the end of electrodes by silver paste and then heated at  $200\text{ }^\circ\text{C}$  for 2 hrs in a furnace.

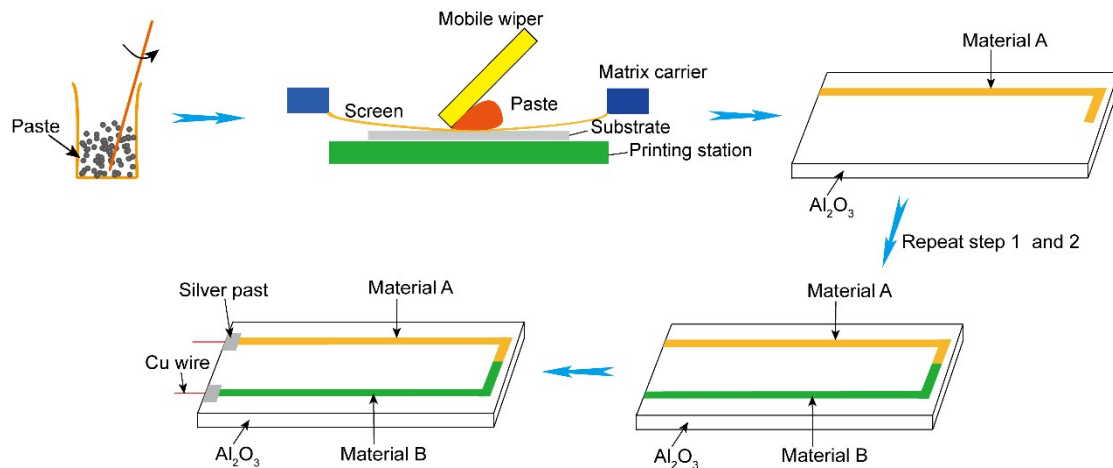

**Fig. S1.** Schematic diagram of screen-printing thermocouple.

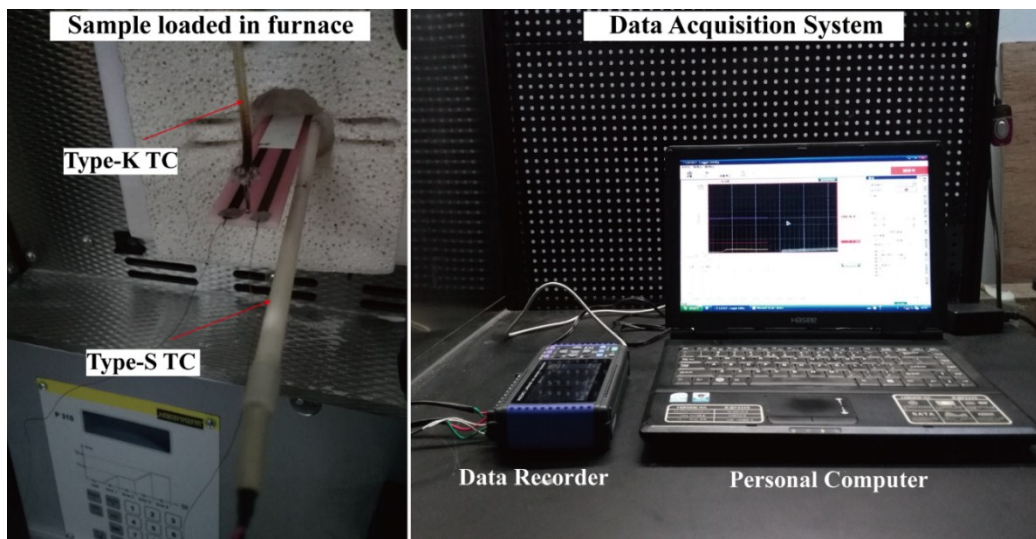

**Fig. S2.** Photograph of the test bed used for high-temperature thermoelectric measurement.

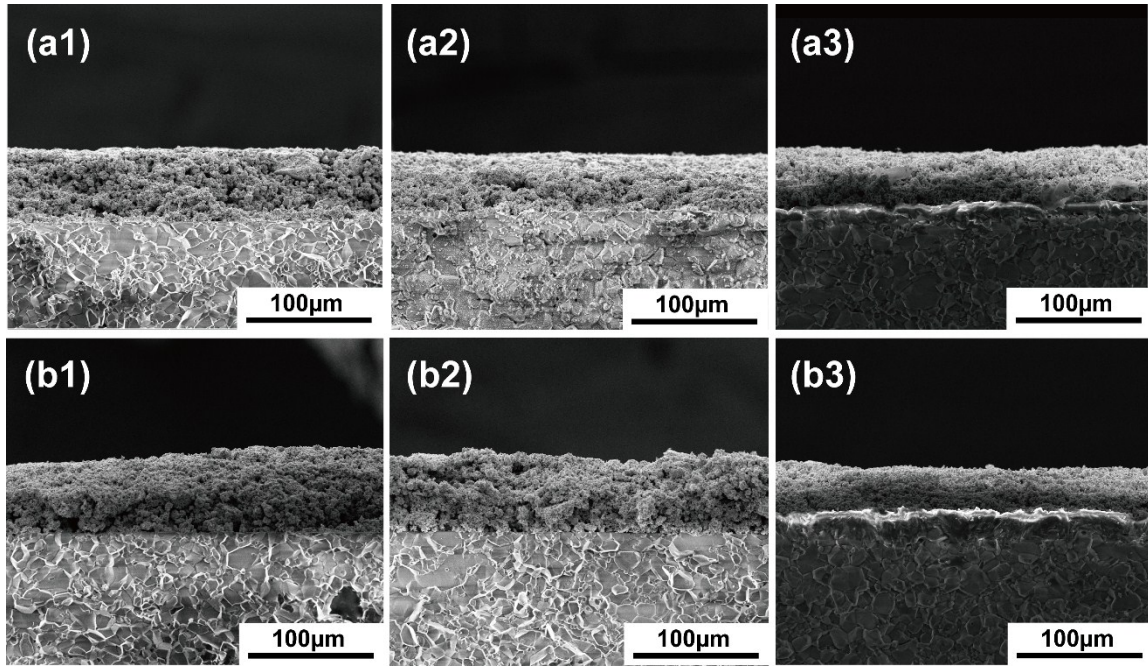

**Fig. S3.** SEM pictures of cross sections of  $\text{In}_2\text{O}_3$ , ITO and 0.2LSCO. Figures **A**(1-3) represent the cross sections of  $\text{In}_2\text{O}_3$ , ITO and 0.2LSCO treated at 1270 °C for 2hrs, respectively. Figures **B**(1-3) represent the cross sections of  $\text{In}_2\text{O}_3$ , ITO and 0.2LSCO treated at 1270 °C for 12 hrs, respectively.

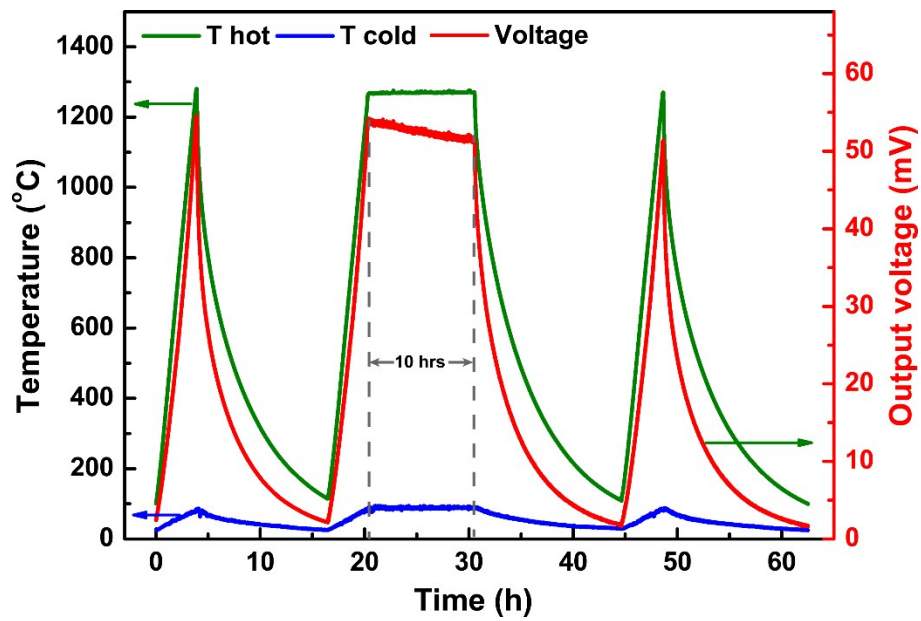

**Fig. S4.** Thermoelectric response of the ITO vs.  $\text{In}_2\text{O}_3$  thermocouple. The red curve represents the thermoelectric voltage corresponding to the secondary y-axis. The olive and the blue curves are the hot junction ( $T_{\text{hot}}$ ) and cold junction ( $T_{\text{cold}}$ ) temperatures, respectively, corresponding to the primary y-axis.

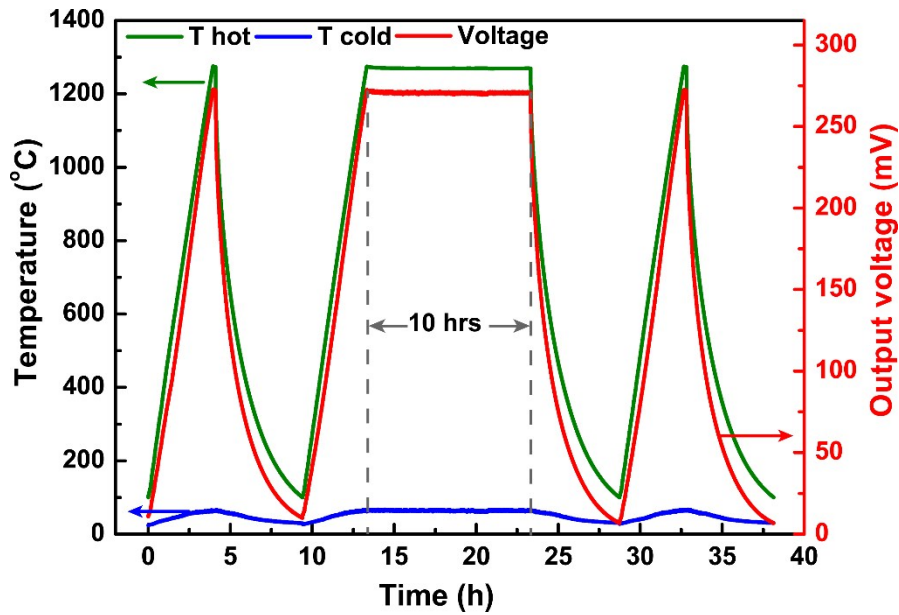

**Fig. S5.** Thermoelectric response of 0.2LSCO vs. ITO thermocouple. The red curve represents the thermoelectric voltage corresponding to the secondary y-axis. The olive and the blue curves are the hot junction ( $T_{\text{hot}}$ ) and cold junction ( $T_{\text{cold}}$ ) temperatures, respectively, corresponding to the primary y-axis.

Fig. S6 shows the output voltage variations of ITO vs.  $\text{In}_2\text{O}_3$ , 0.2LSCO vs. ITO and 0.2LSCO vs.  $\text{In}_2\text{O}_3$  thick-film thermocouples soaked at  $1270\text{ }^\circ\text{C}$  for 10 hrs, respectively. The magenta dash lines represent their own mean values in the picture. For 0.2LSCO vs. ITO and 0.2LSCO vs.  $\text{In}_2\text{O}_3$ , there are very small voltage variation around their mean value when the temperature of the heating furnace reach the dynamic balance at about  $1270\text{ }^\circ\text{C}$  compared with standard commercial thermocouple Type-S, indicating they have a very high thermal stability. The mean values of them are derived from calculating the output voltages of 2 hrs to 10 hrs. While for ITO vs.  $\text{In}_2\text{O}_3$ , the output

voltage reduces continuously to form an obvious deviation from its mean value, indicating it is unstable to suffer from high temperature for a long time.

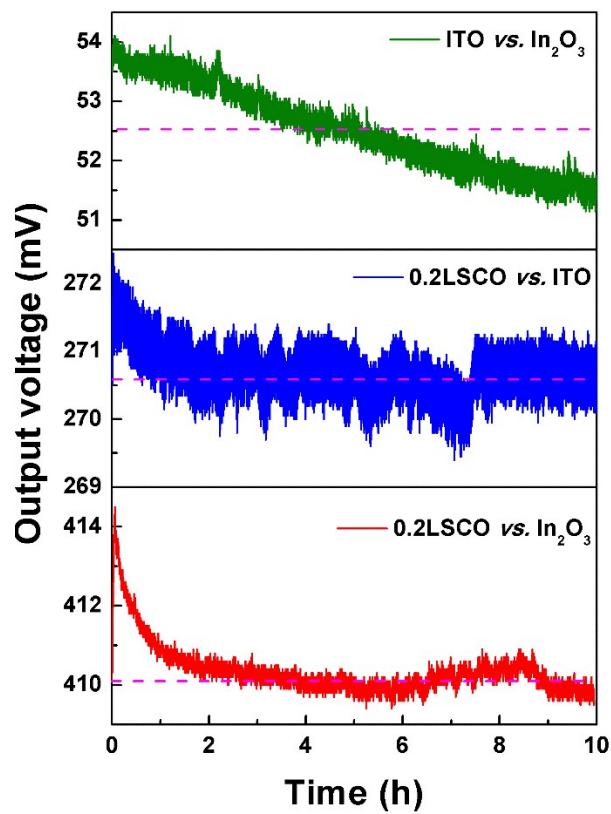

**Fig. S6.** The output voltage variations of ITO vs. In<sub>2</sub>O<sub>3</sub>, 0.2LSCO vs. ITO and 0.2LSCO vs. In<sub>2</sub>O<sub>3</sub> thick-film thermocouples soaked at 1270 °C for 10 hrs, respectively.

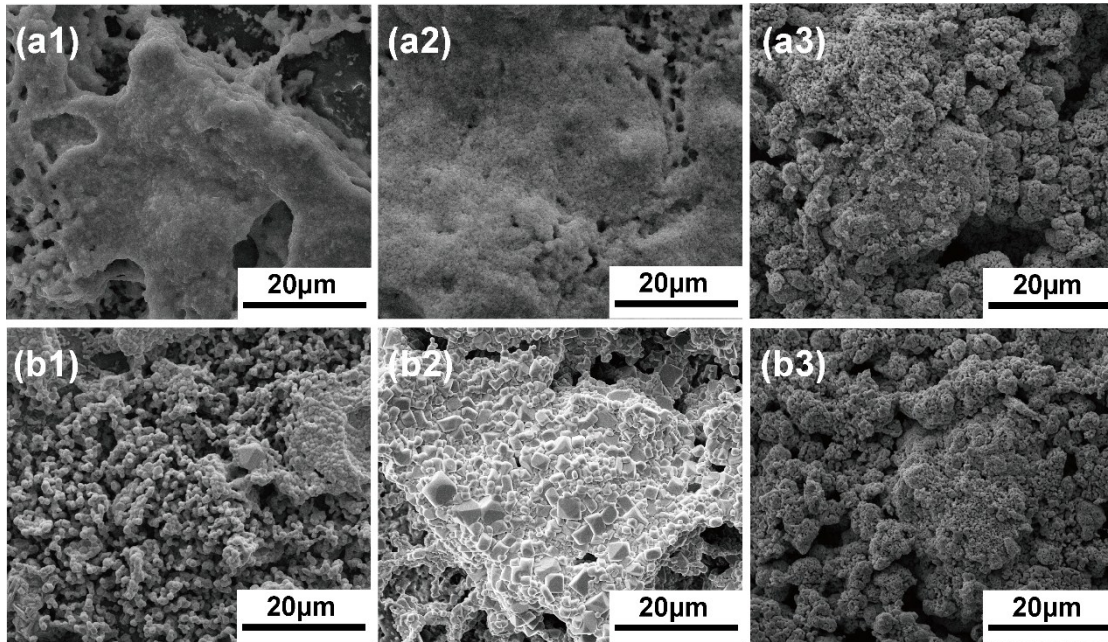

**Fig. S7.** SEM pictures of the surface of In<sub>2</sub>O<sub>3</sub>, ITO and 0.2LSCO. Figures A(1-3) represent the surface of In<sub>2</sub>O<sub>3</sub>, ITO and 0.2LSCO treated at 1270 °C for 2 hrs, respectively. Figures B(1-3) represent the surface of In<sub>2</sub>O<sub>3</sub>, ITO and 0.2LSCO treated at 1270 °C for 12 hrs, respectively.
